# Supplementary figures and images for: Effect of Amphotericin B on the Thermodynamic Properties and Surface Morphology of the Pulmonary Surfactant Model Monolayer during Respiration
Source: MDPI journal article supplement (doi:10.3390/molecules28124840), 2023-06-18

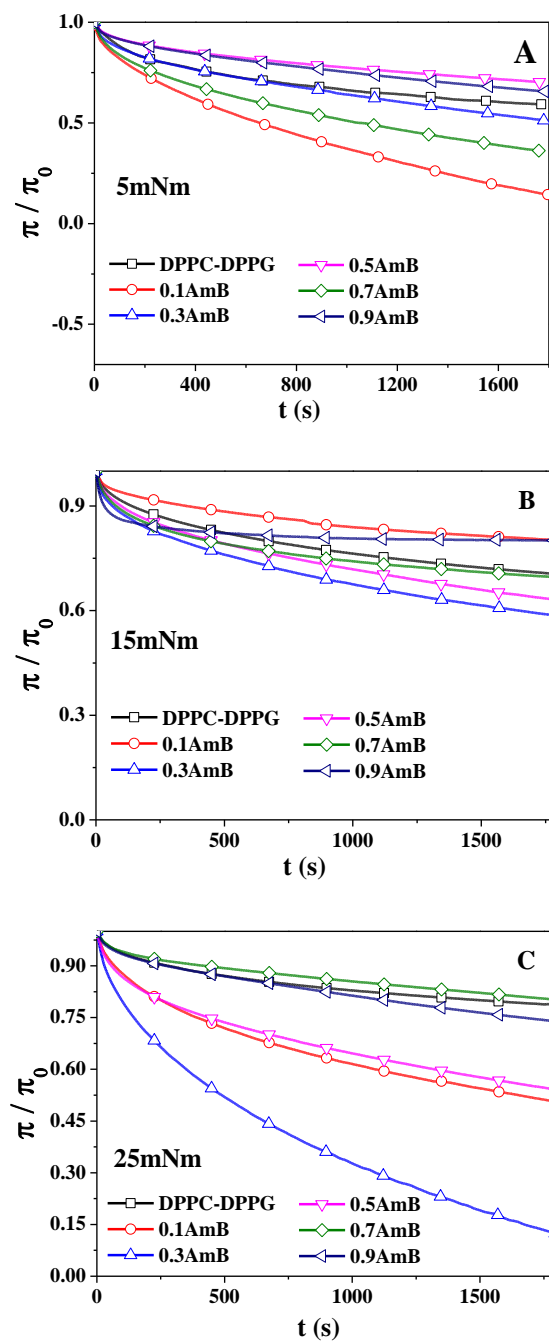

Figure S1 The  $\pi / \pi_0 - t$  curves of the AmB/DPPC/DPPG mixed monolayer at 5mN/m, 15mN/m and 25mN/m.

Supplement: s1 [file s1]
